# Supplementary material
Source: publisher figshare collection journal article supplement (https://acs.figshare.com/ndownloader/files/4108486)
Supplement: Supplementary file 1 [file 4108486]

# Supporting Information

## Engineering Cellular Degradation of Multilayered Capsules through Controlled Crosslinking

*Kang Liang, Georgina K. Such, Zhiyuan Zhu, Sarah J. Dodds, Angus P. R. Johnston,*

*Jiwei Cui, Hirotaka Ejima, and Frank Caruso\**

Department of Chemical and Biomolecular Engineering, The University of Melbourne,

Parkville, Victoria 3010, Australia

fcaruso@unimelb.edu.au

**Table S1. Crosslinker Amounts and Concentrations in Each Silica Particle Suspension**

| <b>Sample</b> | <b>Amount of crosslinker for planar surfaces, mol</b> | <b>Concentration of crosslinker for planar surfaces, M</b> | <b>Amount of crosslinker for silica particle templates<sup>a</sup>, mol</b> | <b>Concentration of crosslinker for silica particle templates, M</b> |
|---------------|-------------------------------------------------------|------------------------------------------------------------|-----------------------------------------------------------------------------|----------------------------------------------------------------------|
| A             | $5.0 \times 10^{-13}$                                 | $5 \times 10^{-10}$                                        | $3.1 \times 10^{-8}$                                                        | $2.1 \times 10^{-5}$                                                 |
| B             | $5.0 \times 10^{-12}$                                 | $5 \times 10^{-9}$                                         | $3.1 \times 10^{-7}$                                                        | $2.1 \times 10^{-4}$                                                 |
| C             | $1.3 \times 10^{-11}$                                 | $1.3 \times 10^{-8}$                                       | $7.7 \times 10^{-7}$                                                        | $5.1 \times 10^{-4}$                                                 |
| D             | $2.5 \times 10^{-11}$                                 | $2.5 \times 10^{-8}$                                       | $1.5 \times 10^{-6}$                                                        | $1.0 \times 10^{-3}$                                                 |

<sup>a</sup>The same amount of crosslinker per unit surface area as the planar films was calculated to achieve the same degree of crosslinking.

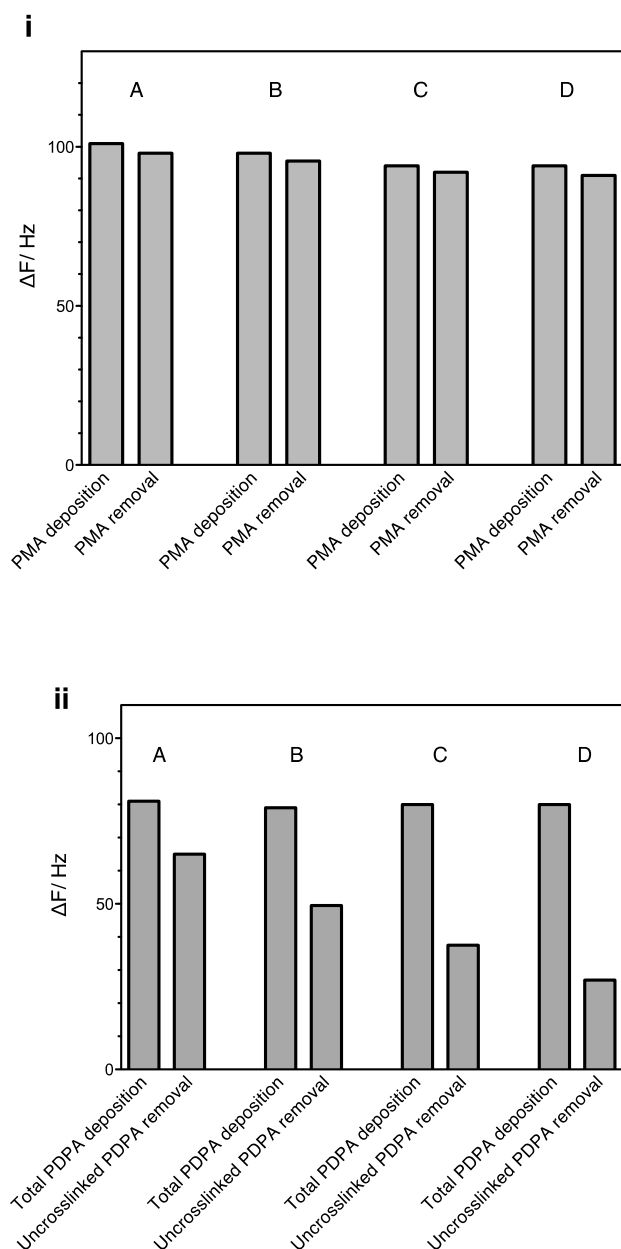

**Figure S1.** QCM analysis of five-layer PDPA<sub>Alk</sub> films crosslinked with (A)  $5.0 \times 10^{-13}$ , (B)  $5.0 \times 10^{-12}$ , (C)  $1.3 \times 10^{-11}$ , and (D)  $2.5 \times 10^{-11}$  mol of a redox-responsive linker. i) Frequency change for the deposition of five layers of PMA at pH 4 and PMA removal at pH 7.4; ii) Frequency change for the deposition of five layers of PDPA at pH 4 and removal of noncrosslinked PDPA after crosslinking (of PDPA) and PMA removal.

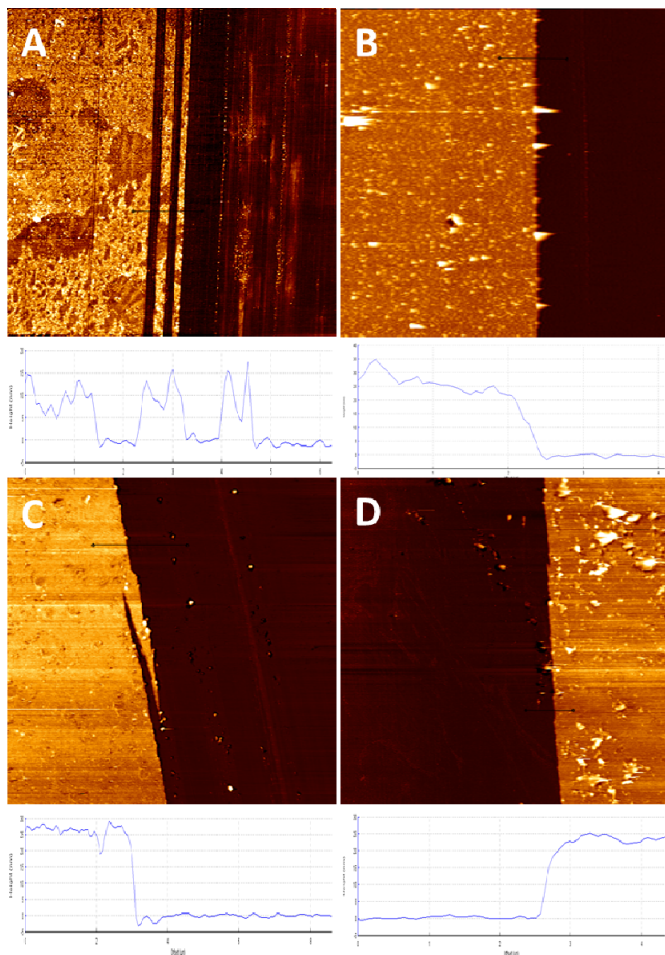

**Figure S2.** Aqueous AFM thickness analysis of five-layer PDPA<sub>Alk</sub> films crosslinked with (A)  $5.0 \times 10^{-13}$ , (B)  $5.0 \times 10^{-12}$ , (C)  $1.3 \times 10^{-11}$ , and (D)  $2.5 \times 10^{-11}$  mol of a redox-responsive linker.

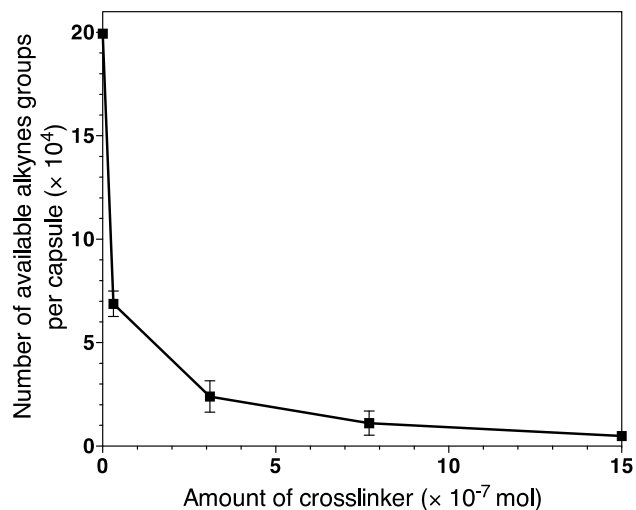

**Figure S3.** Available alkyne moieties in each PDPA capsule resulting from varying the crosslinker concentration, assessed from the specific radioactivity of  $2 \times 10^8$  capsules.

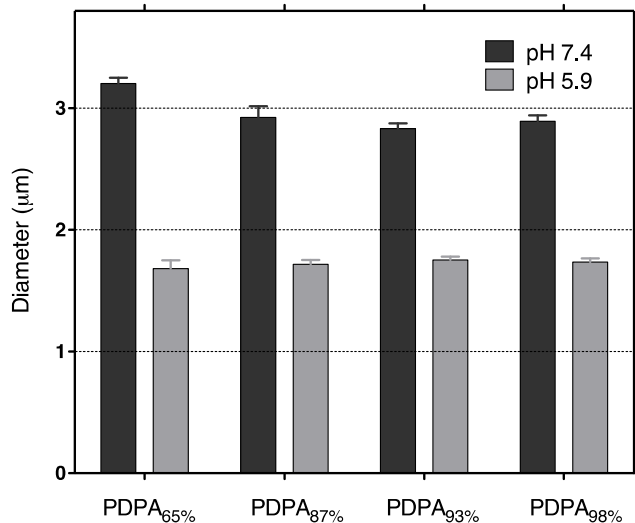

**Figure S4.** Average diameters of PDPA<sub>65%</sub>, PDPA<sub>87%</sub>, PDPA<sub>93%</sub>, and PDPA<sub>98%</sub> capsules prepared from 2.6  $\mu\text{m}$ -diameter silica templates and dispersed in PBS. The diameters of 20 capsules were measured at each pH using a fluorescence microscope.

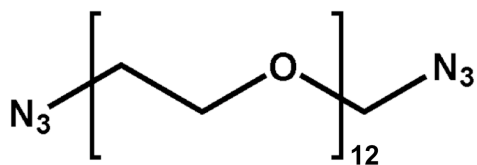

**Figure S5.** Structure of the nonreducible bisazide crosslinker, bisazido dodecaethylineneglycol.

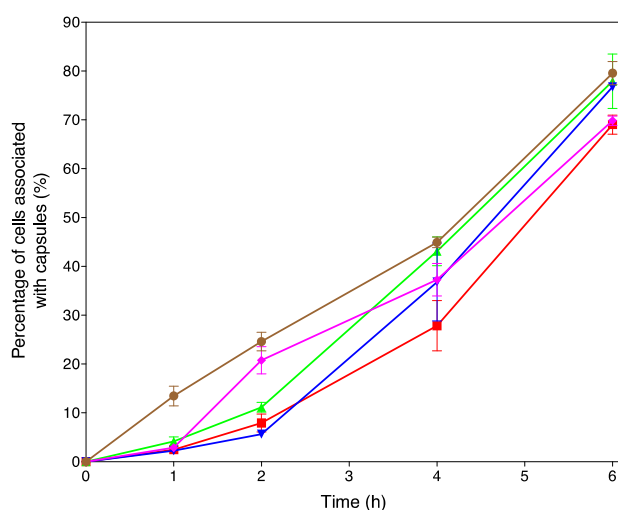

**Figure S6.** Capsule-cell association kinetics as a function of time at 37 °C, as monitored by flow cytometry. Capsules were crosslinked at 65% (PDPA<sub>65%</sub>, red squares), 87% (PDPA<sub>87%</sub>, green triangles), 93% (PDPA<sub>93%</sub>, blue triangles), and 98% (PDPA<sub>98%</sub>, purple diamonds) degrees using a redox-responsive linker. A control sample of capsules was crosslinked with a nondegradable crosslinker (brown circles). Experiments were performed in triplicate.

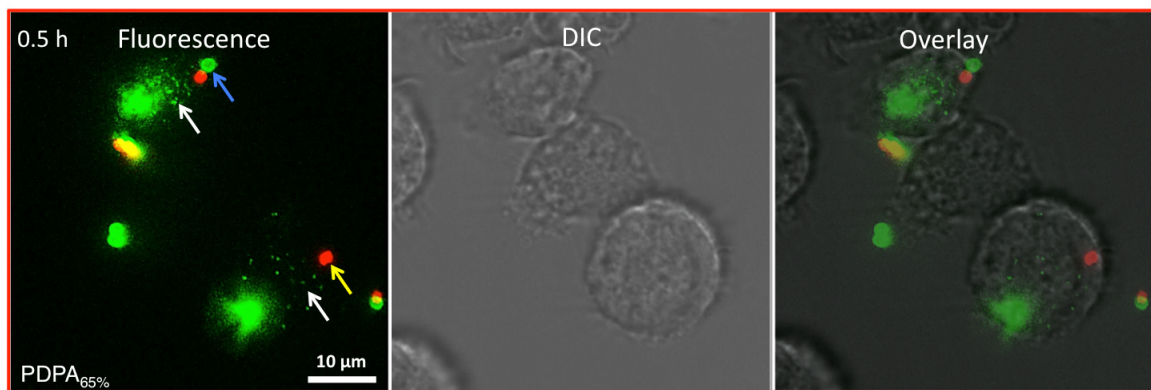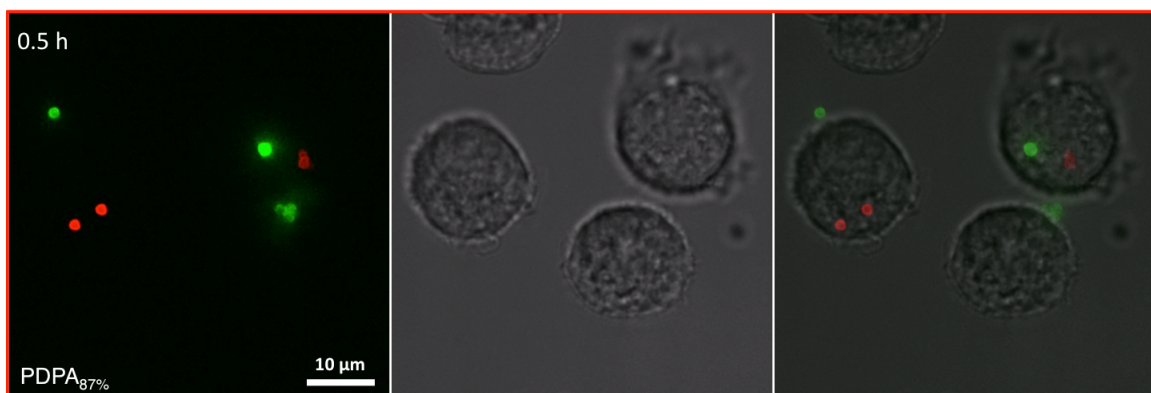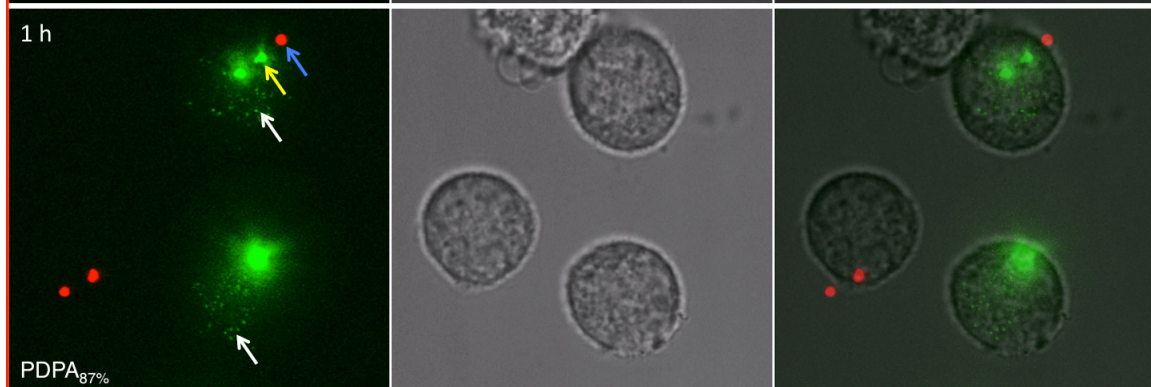



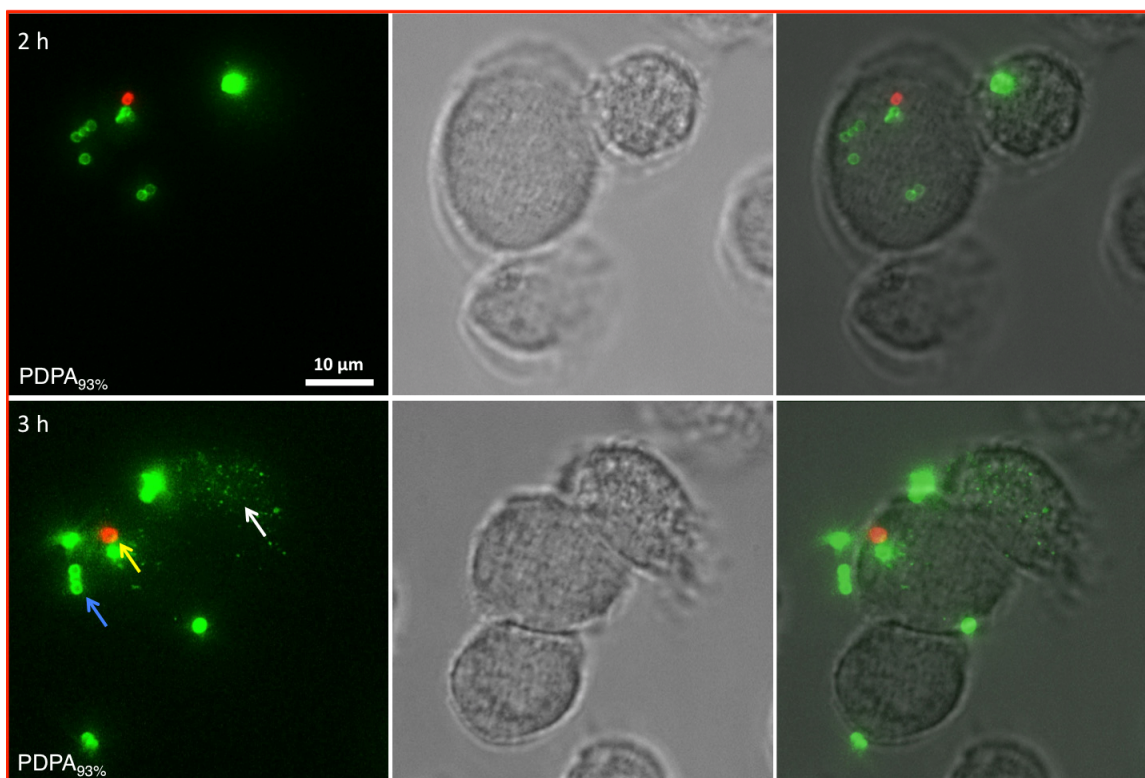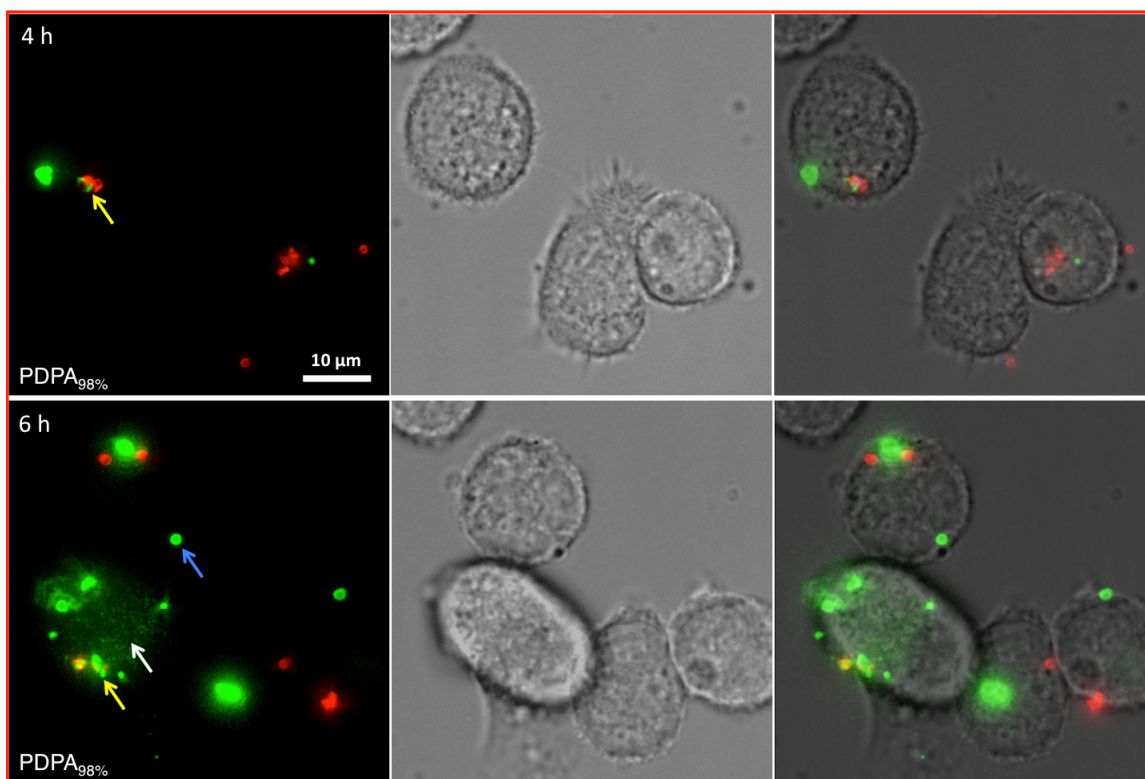



**Figure S7.** Enlarged images of live deconvolution microscopy (maximum intensity projection) of JAWS II cells incubated with degradable PDPA<sub>65%</sub>, PDPA<sub>87%</sub>, PDPA<sub>93%</sub>, and PDPA<sub>98%</sub> capsules (green) using a bisazide redox-responsive linker and non-degradable capsules (red). Time frames just before and after capsule degradation are shown. White arrows indicate degraded capsules, yellow arrows indicate distorted capsules inside cells, and blue arrows indicate capsules outside cells. Scale bars are 10  $\mu\text{m}$ .

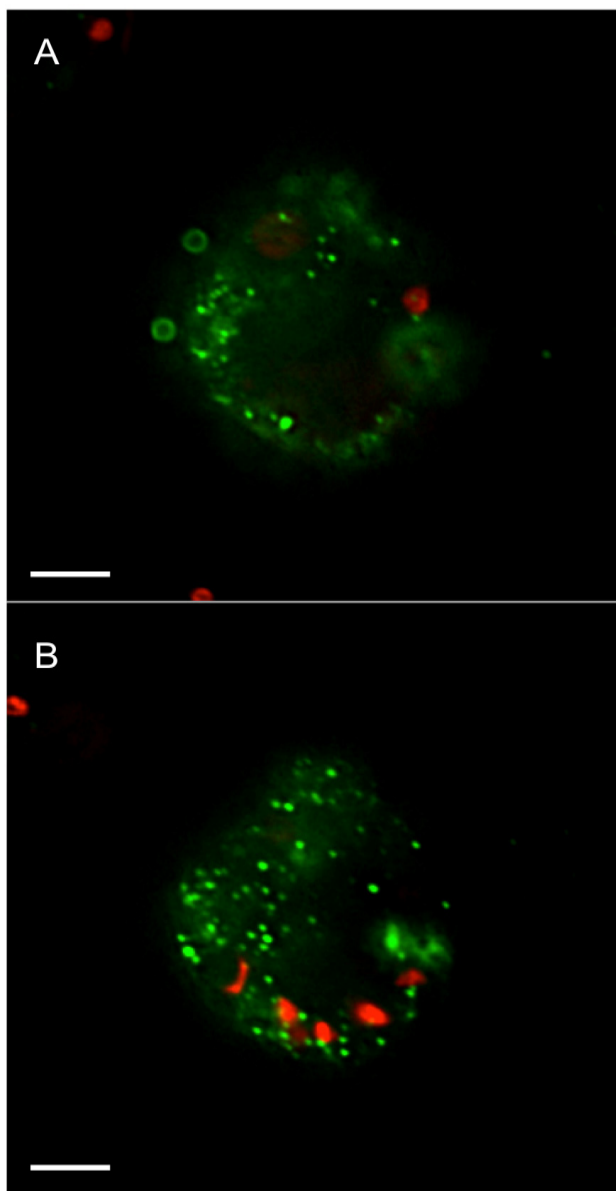

**Figure S8.** Deconvolution microscopy images of JAWS II cells incubated with degradable PDPA capsules (green) and non-degradable PDPA capsules (red). Image A and image B indicate different z-sections from the same cell.
